# Supplementary material for: Correlation of gene expression with magnetic resonance imaging features of retinoblastoma: a multi-center radiogenomics validation study
Source: Springer Nature journal article supplement (doi:10.1007/s00330-023-10054-y), 2023-08-24

**Appendix Table 1:** Cohen's Kappa for interreader agreement of imaging features

| MRI feature                               | Cohen's Kappa |
|-------------------------------------------|---------------|
| Number of lesions                         | 0.38          |
| Growth pattern                            | 0.55          |
| Tumor location                            | 0.29          |
| Eye size                                  | 0.18          |
| Enhancement choroid beneath tumor         | 0.50          |
| Tumor homogeneity                         | 0.37          |
| Dominating shape of largest tumor lesion  | 0.42          |
| Irregular/ill-defined tumor margins       | 0.48          |
| Calcifications                            | 0.29          |
| Compactness of the entire mass            | 0.23          |
| Enhancement anterior eye segment          | 0.74          |
| Proportion contrast enhancing tumor (CET) | 0.40          |
| Proportion necrosis                       | 0.36          |
| Retinal detachment                        | 0.68          |
| Shallowness of the anterior eye chamber   | 0.68          |
| Subretinal composition                    | 0.60          |
| Subretinal seeding                        | 0.42          |
| Vitreous hemorrhage                       | 0             |
| Vitreous seeding                          | 0.5           |

**Appendix Table 2:** Functional annotation of differentially expressed genes between MRI features

| MRI Feature      | Site      | Comparison                                            | Differential expression | No.DEGs | Functional annotation             | FDR      |
|------------------|-----------|-------------------------------------------------------|-------------------------|---------|-----------------------------------|----------|
| Tumor location   | Amsterdam | Entire globe filled vs. Greater part of tumor behind  | Upregulated             | 220     | Organelle fission                 | 1.8E-7   |
|                  |           |                                                       |                         |         | Cell cycle process                | 2.5E-7   |
|                  |           |                                                       |                         |         | DNA repair                        | 2.1E-7   |
|                  |           |                                                       | Downregulated           | 456     | Sensory organ development         | 4.4E-11  |
|                  |           |                                                       |                         |         | Cell adhesion                     | 1.5E-11  |
|                  |           |                                                       |                         |         | Visual perception                 | 1.5E-9   |
| Tumor location   | Amsterdam | Entire retina filled vs. Greater part of tumor behind | Upregulated             | 111     | Nuclear division                  | 1.6E-18  |
|                  |           |                                                       |                         |         | Organelle fission                 | 6.6E-18  |
|                  |           |                                                       |                         |         | Cell cycle process                | 1.8E-17  |
|                  |           |                                                       | Downregulated           | 677     | Sensory organ development         | 2.8E-22  |
|                  |           |                                                       |                         |         | Cell adhesion                     | 4.07E-19 |
|                  |           |                                                       |                         |         | Visual perception                 | 3.01E-17 |
|                  |           |                                                       |                         |         | Regulation of cell motility       | 2.09E-16 |
| Tumor location   | Atlanta   | Entire retina filled vs. Greater part of tumor behind | Downregulated           | 25      | Visual perception                 | 2.37E-7  |
| Virtuous seeding | Amsterdam | Outside 3mm range vs. inside 3mm range                | Upregulated             | 18      | Extracellular matrix organization | 1.99E-3  |

Supplementary Materials

Appendix Figure 1

Association of imaging features with photoreceptor gene expression. Plaque-shaped tumors (top) and tumor with irregular borders (bottom) showed lower photoreceptor gene expression. Results were only found in the current cohort (validation set) and not in the previous cohort (test set).

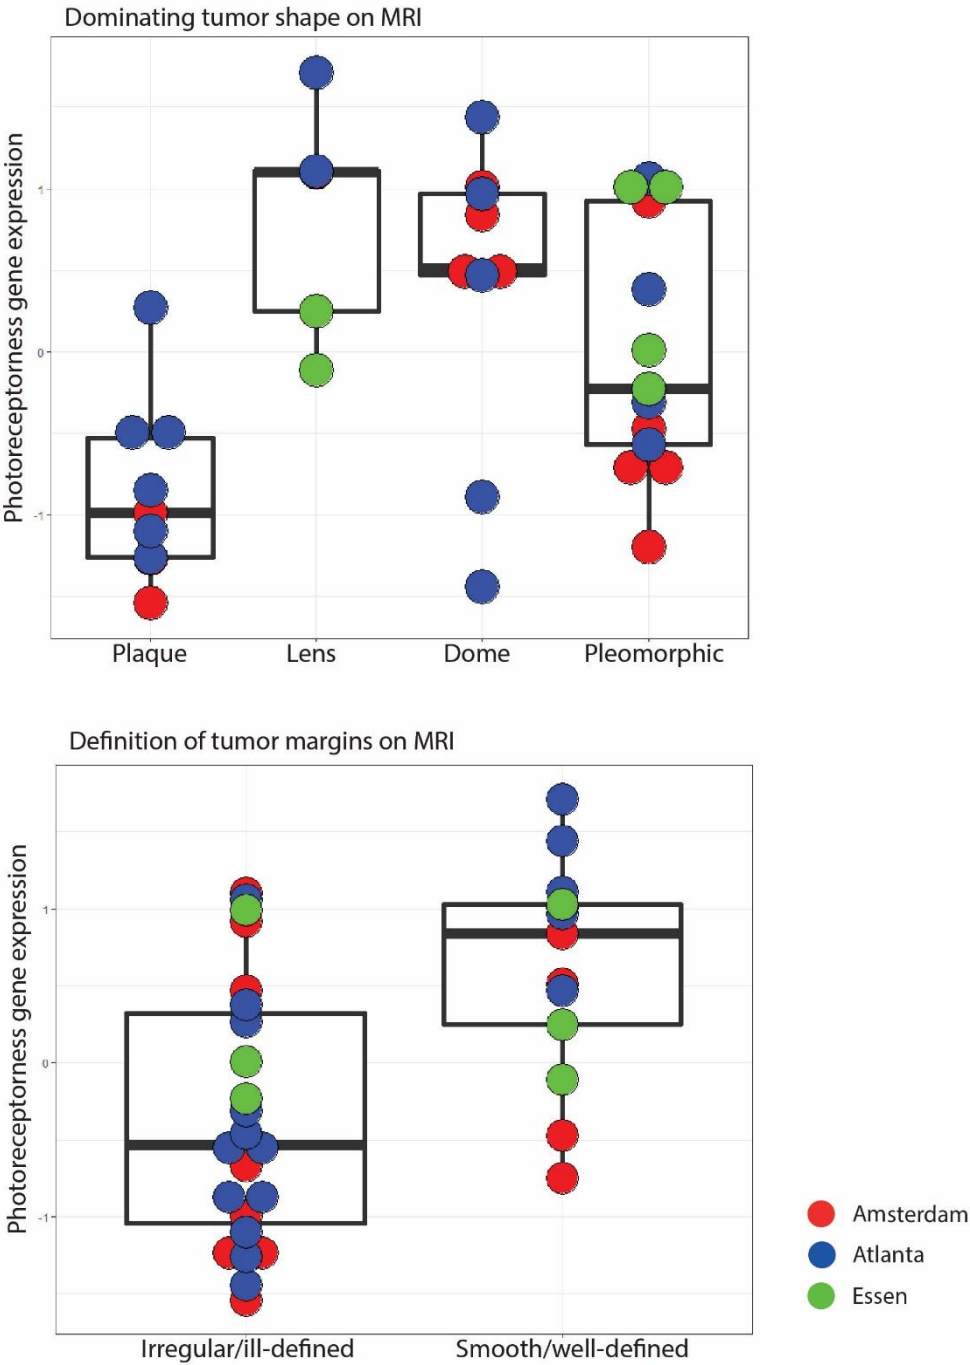

**Appendix Figure 2**

K-means clustering analysis of the differentially expressed genes amongst the MRI features based on the genes previously identified in the test cohort, but according to their expression in the validation cohort. Clustering for subretinal seeding (top) and vitreous seeding (bottom).

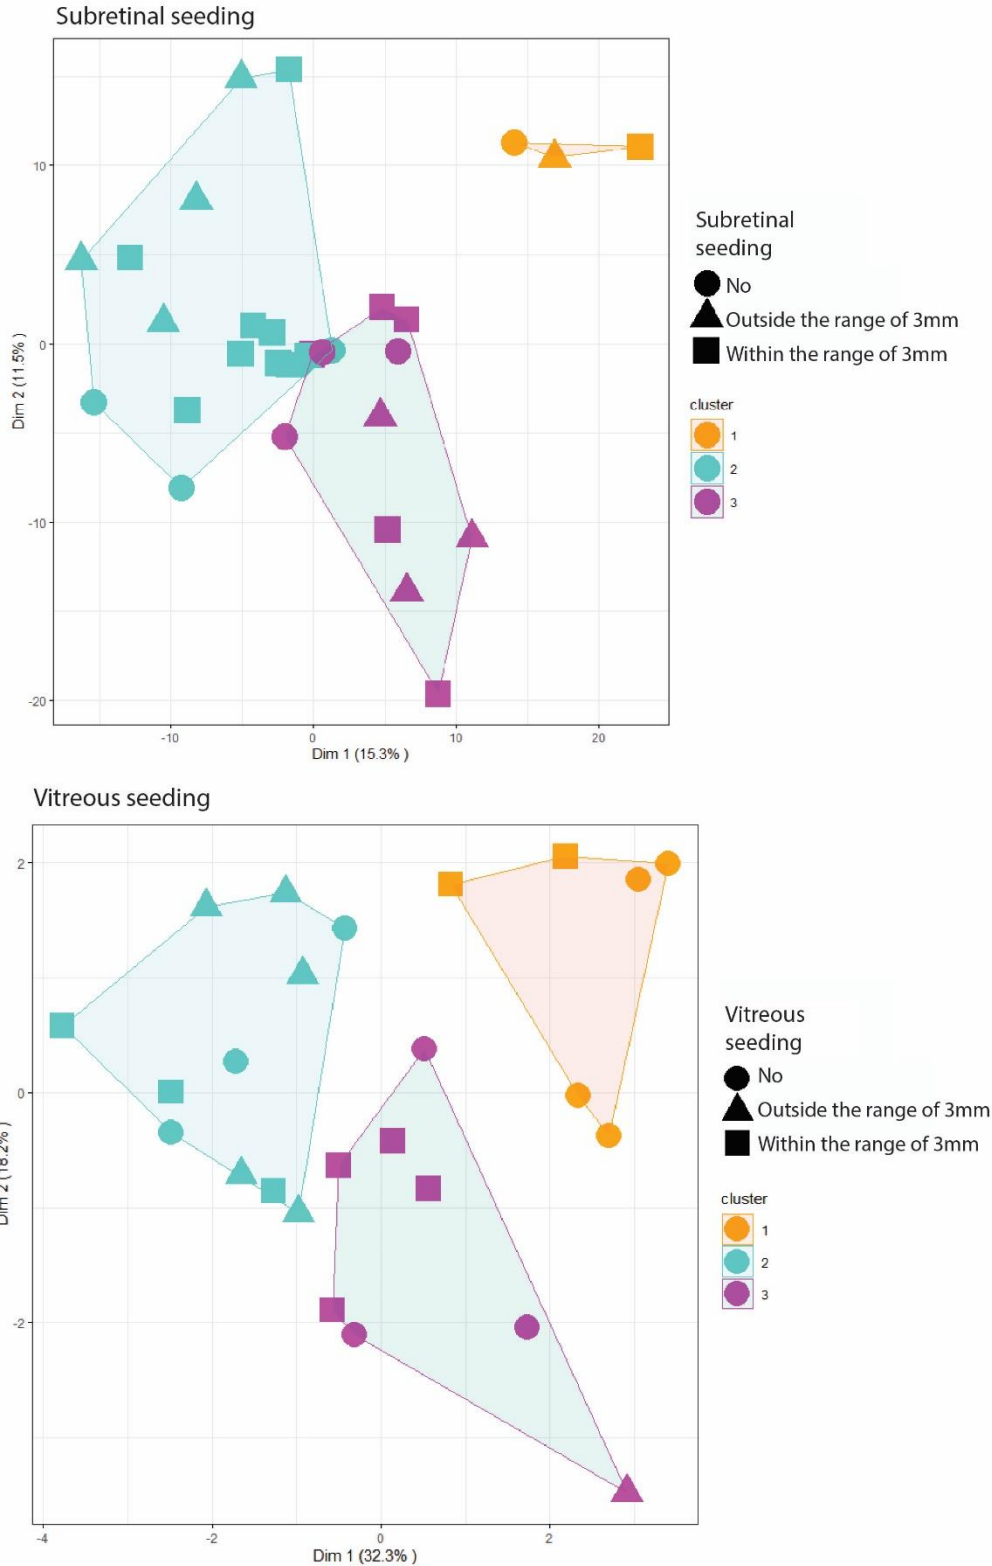

Supplement: MOESM1 [file 25958806]
